# Supplementary material for: Gene Expression Analysis of Potato (Solanum tuberosum L.) Lipoxygenase Cascade and Oxylipin Signature under Abiotic Stress
Source: MDPI journal article supplement (doi:10.3390/plants11050683), 2022-03-02
Supplement: s1 [file s1]

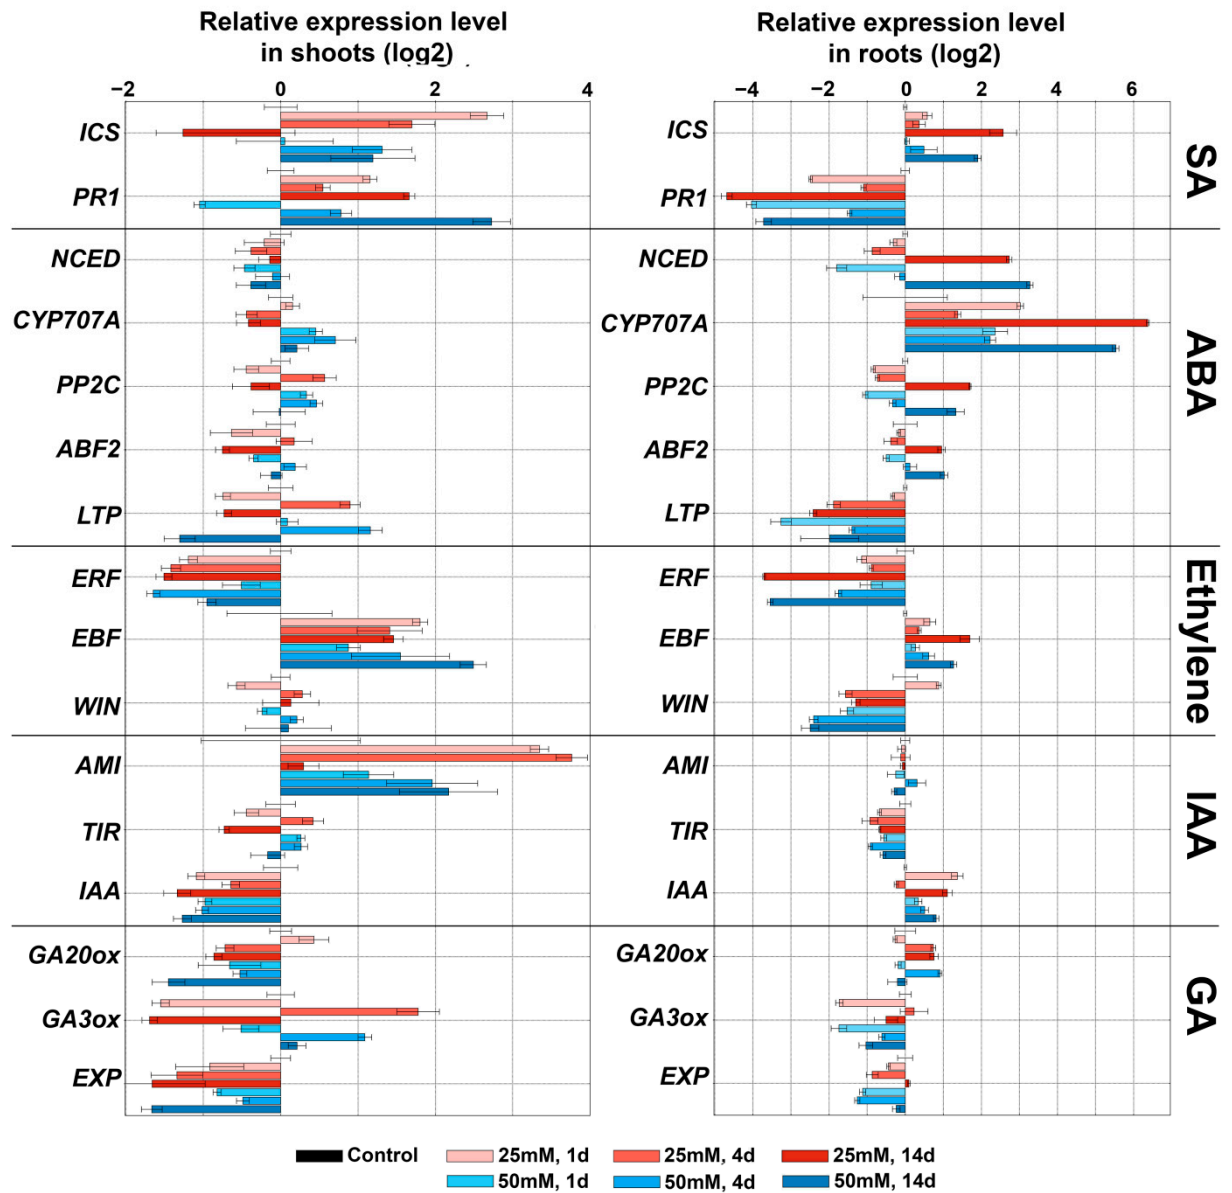

**Supplementary Figure S1.** Changes in marker genes expression of other signaling pathways in response to treatment with NaCl 25 mM (red) and 50 mM (blue) in shoots and roots. Abbreviations: ICS (isochorismate synthase), PR1 (pathogenesis-related protein 1), ERF (ethylene-inducible transcription factor), EBF (EIN3 (ETHYLENE-INSENSITIVE3) BINDING F-BOX1), WIN (wound-induced (WIN) protein), NCED (9-cis-epoxycarotenoid dioxygenase), CYP707A (ABA-8'-hydroxylases), ABF2 (ABRE-binding bZIP proteins), PP2C (serine/threonine phosphatase 2C), LTP (lipid transfer protein), GA20ox (gibberellin (GA) 20-oxidase), GA3ox (GA3 oxidase), EXP (expansins), AMI (indole-3-acetamide hydrolase), TIR (transport inhibitor response), IAA (indole-3-acetic acid inducible 28 (IAA28)).

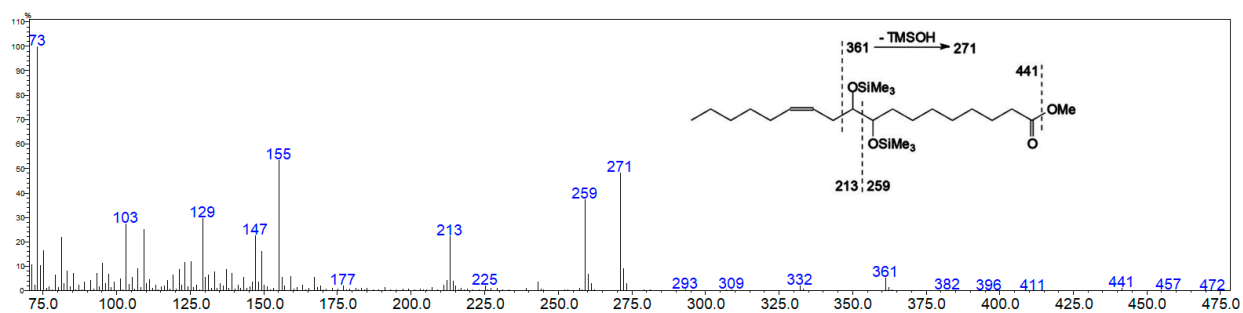

**Supplementary Figure S2.** The electron impact mass spectrum of compounds 5a (vic-diol) and the corresponding mass fragmentation scheme. Compound 5b has the identical spectrum.

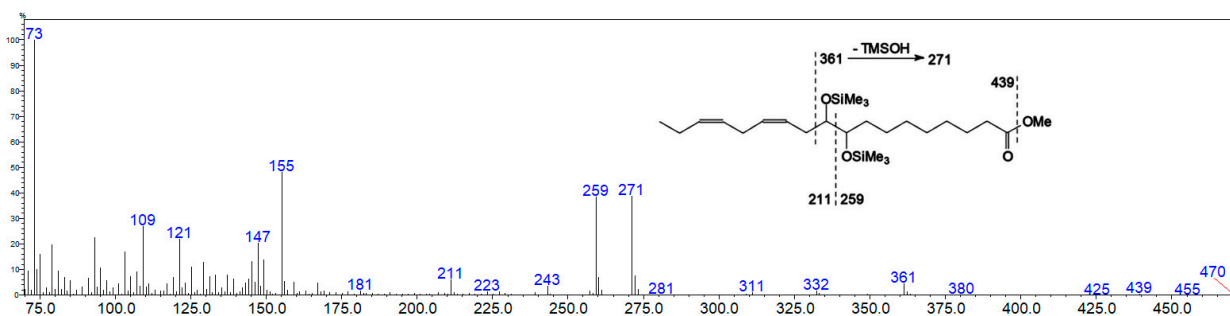

**Supplementary Figure S3.** The electron impact mass spectrum of compounds 6a (vic-diol) and the corresponding mass fragmentation scheme. Compound 6b has the identical spectrum.

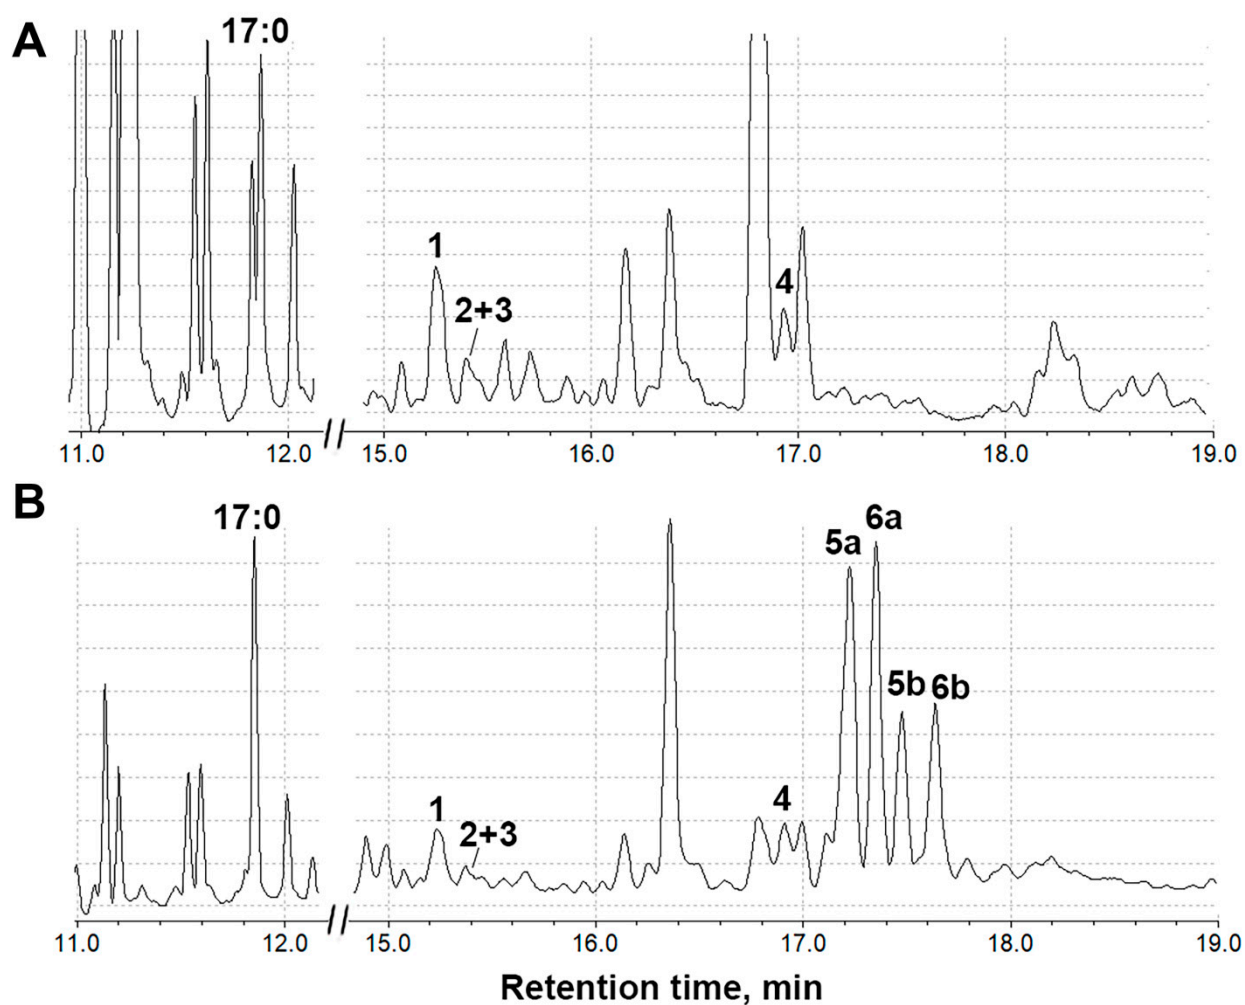

**Supplementary Figure S4.** The total ion current (TIC) GC-MS chromatograms of lipxygenase cascade products (Me/TMS) in *S. tuberosum* shoots extracts after incubation with linoleic and  $\alpha$ -linolenic acids: (A) shoots after NaCl treatment; (B) roots after NaCl treatment. **1** – 9-HOD (derivative of 9-LOX product); **2** – 9-HOT (derivative of 9-LOX product); **3** – 13-HOD + 13-HOT, **4** – 9,10-epoxy-11-hydroxy-12-octadecenoic acid (9-EAS product); **5a** and **5b** – *threo* and *erythro* isomers of 9,10-dihydroxy-12-octadecenoic acid (*vic*-diols formed the NaBH<sub>4</sub> reduction of alpha-ketol, 9-AOS product of 9-HPOD conversion), **6a** and **6b** – *threo* and *erythro* isomers of 9,10-dihydroxy-12,15-octadecadienoic acid (*vic*-diols formed the NaBH<sub>4</sub> reduction of alpha-ketol, 9-AOS product of 9-HPOT conversion).

**Supplementary Table S1.** Primers for qRT-PCR amplification.

|                           | Gene name        | Forward primer                | Reverse primer               |
|---------------------------|------------------|-------------------------------|------------------------------|
| <b>LOX pathway</b>        | <i>StLOX</i>     | GTAGACCACCAACACGAACAGATCC     | CAGGGCATGTAATTCAGGGAGG       |
|                           | <i>StAOS1</i>    | CCATCGCCACCTGTAAACAAG         | CCGCCTGTGAGATCAGTGGAG        |
|                           | <i>StAOS2</i>    | CCCAAATTCCATGAACTTATACAGAG    | GACCGAGAGTGAGTACAGGATGAAGC   |
|                           | <i>StAOS3</i>    | CCTATTTTCGATTGTTTTGTGAGGGG    | CTCCAAGTTTCTCCGCTTCATC       |
|                           | <i>StHPL</i>     | CTGAACCTAAACATGCCCAGATTAAG    | GCCGAGGAGAGTGAGGGAGAAG       |
|                           | <i>StDES</i>     | CCCTCATCTCTTCAGGTTTGTGG       | GGTGGGCGAAGTCTCAATGTCTC      |
|                           | <i>StHPL/EAS</i> | CTTGCAGGATTCAACGCTTATGG       | CACCTTCCTCCTTGATGATCGTC      |
|                           | <i>StJaz</i>     | CAAGTGATTTCATCGTCGTCATCGTC    | GAAAATCATCAAAAACAATGACTTGTCC |
|                           | <i>StAOC</i>     | GCTCAATGAACGTGACCGTGAAG       | CGATCTCCTTTCTTCTTCTTCTCGTG   |
| <b>SA</b>                 | <i>StICS</i>     | GGTACTTGCTCGTAGCACCAGAGTTG    | GCTGAGGCGGTCCCAGTAAATAG      |
|                           | <i>StPR1</i>     | CATCTCATTGTTACTCACTTGTCTCATGG | GAATTGGCATAATTTTGTGCTCGGGATG |
| <b>Ethylene</b>           | <i>StERF</i>     | GGATGGTCGCCGTTTAGTTTCAC       | CCGCTGTCTAACGCCTCTATAATGTC   |
|                           | <i>StEBF</i>     | GCCGTGACTGACATAGTCCTTATTGG    | CAGAACAGCTTCAAGTTTGGACAACC   |
|                           | <i>StWIN</i>     | GCCGTGACTGACATAGTCCTTATTGG    | CAGAACAGCTTCAAGTTTGGACAACC   |
| <b>ABA</b>                | <i>StABF2</i>    | GACCACAGCAACTGCAACAGAAC       | CTGCCCAACTGCCACTATTTG        |
|                           | <i>StNCED2</i>   | GCGAACTACAAAACCTCTTCC         | CCCCGTTAATGCAATTAGGG         |
|                           | <i>StPP2C</i>    | CGAGGTGGAGAAGGAAGAACTC        | CACTGTGGAGTCTGAAGCTCGC       |
|                           | <i>StC707A</i>   | GTGTTTAAGCTCTTTGATTGTGGTG     | CTGGGGTTTTGTGAGTAAAGCTG      |
|                           | <i>StLtp1</i>    | GTCCTCTCGGAGGCTGTTGTG         | GGGAGACTAGCAGCTTTGCC         |
| <b>GA</b>                 |                  |                               |                              |
|                           | <i>StGA3ox</i>   | GCCCTACAATAAATTCTTACCCG       | GGTACAACCCGTTTGACAATATGTG    |
|                           | <i>StGA20ox</i>  | CAAAGCTACCTTGGAAGAGACACTC     | GAAGTGGCTCTTCTCTACGCCTAG     |
|                           | <i>StEXP7</i>    | GCCTAATGATAATGGTGGTTGGTG      | CATAACCTTCGTAATGTCACCTGC     |
| <b>Auxin, IAA</b>         | <i>StAMI</i>     | GAGTACCTGGAGGATCTTCAAGTGG     | CATCCAAGTATCAAACTTTGTGC      |
|                           | <i>StTIR1</i>    | GAAGTGGAGGACCTTAGTGGGC        | GCACGATTTATCCGAAGAGTTCTC     |
|                           | <i>StIAA28</i>   | GGGTCTTTTCAGAACTGTTGATTTG     | CTTCCTGAATGATCTCACTGGTGG     |
| <b>Housekeeping genes</b> | <i>STTub</i>     | GTTACTTGCTGTTTGAGATTCCCTG     | CTGTGAGGTAACGTCCATGACG       |
|                           | <i>STEF</i>      | CTTCCTACCTCAAGAAGGTTGGTTAC    | CTTGCTGTTGGTCTCTTGGGC        |
|                           | <i>STGAP</i>     | GGTTAAGGATGAGAAGACCTTC        | GCGGAGATCACAACCTTCTTG        |
|                           | <i>STUbi</i>     | GACAATGTAAAGGCTAAGATTCAAGAC   | GTGGACTCCTTCTGGATGTTGTAG     |
|                           | <i>STAct</i>     | GTGAGTCACACTGTCCCTATCTATG     | CAGTGGTGGTGAACATATAACCTCT    |
|                           | <i>STATP</i>     | GGTAAAGGAGGAGTTGGAAGAC        | CAAGGGCAAATAATGGAGAATAC      |

**Supplementary Table S2.** List of marker genes for different hormonal systems, the expression of which was analyzed in the present study.

|             | Gene designation in the article (in the figures) | Gene name                                         | Function/Role                                          |
|-------------|--------------------------------------------------|---------------------------------------------------|--------------------------------------------------------|
| SA          | ICS                                              | Isochorismate synthase                            | SA biosynthesis                                        |
|             | PR1                                              | Pathogenesis-related protein 1                    | Defense reaction                                       |
| Ethylene    | ERF                                              | Ethylene-inducible transcription factor           | Activation of the expression of ethylene-induced genes |
|             | EBF                                              | EIN3 (ETHYLENE-INSENSITIVE3) BINDING F-BOX1       | Negative regulator of ethylene-dependent signaling     |
|             | Win                                              | Wound-induced (Win) protein                       | Defense reaction                                       |
| ABA         | NCED                                             | 9-cis-epoxycarotenoid dioxygenase                 | ABA biosynthesis                                       |
|             | C707A3                                           | ABA-8'-hydroxylases                               | ABA degradation                                        |
|             | ABF2                                             | ABRE-binding bZIP proteins (transcription factor) | ABA signal transmission                                |
|             | PP2C                                             | serine/threonine phosphatase 2C                   | Negative regulator of ABA signal transmission          |
|             | LTP                                              | Lipid Transfer Protein                            | Lipid Transfer, membrane stabilization                 |
| GA          | GA20ox                                           | GA20-oxidases                                     | Gibberelin biosynthesis                                |
|             | GA3ox                                            | GA3 oxidase                                       | Gibberelin biosynthesis                                |
|             | EXP                                              | Expansins                                         | Loosening of the cell wall                             |
| Auxin (IAA) | AMI                                              | Indole-3-acetamide hydrolase                      | Auxin biosynthesis                                     |
|             | TIR                                              | Transport inhibitor response                      | Auxin signal transmission                              |
|             | IAA                                              | Indole-3-acetic acid inducible 28 (IAA28)         | Repressor of IAA signaling                             |

**Supplementary Table S3.** Identified lipoxygenase (StLOX) in underground potato organs. The matched peptides in the protein sequence are highlighted in red.

| Organ           | Protein                                                     | Score | Protein sequence                                                                                                                                                                                                                                                                                                                                                                                                                                                                                                                                                                                                                                                                                                                                                                                                                                                                                                                                                                                                                                                                                                                                                                                                                                                                                                   |
|-----------------|-------------------------------------------------------------|-------|--------------------------------------------------------------------------------------------------------------------------------------------------------------------------------------------------------------------------------------------------------------------------------------------------------------------------------------------------------------------------------------------------------------------------------------------------------------------------------------------------------------------------------------------------------------------------------------------------------------------------------------------------------------------------------------------------------------------------------------------------------------------------------------------------------------------------------------------------------------------------------------------------------------------------------------------------------------------------------------------------------------------------------------------------------------------------------------------------------------------------------------------------------------------------------------------------------------------------------------------------------------------------------------------------------------------|
| roots and tuber | Q43190 (LOX14_SOLTU)<br>Lipoxygenase<br>Mr 96909<br>pI 5.50 | 597   | <p>1 MLGQIVGGLI GGHHDSKKVK GTVVMKK<b>NA LDFTDLAGSL TDK</b>IFEALGQ<br/> 51 KVSFQLISSV QSDPANGLOQ KHSNPAYLEN FLFTLTPLAA GETAFGVTFD<br/> 101 WNEEFGVPGA FIIKNTHINE FFLKSLTLED VPNHGKVHFV CNSWVYPSFR<br/> 151 YKSDR<b>IFFAN QPYLPSETPE LLR</b>KYRENEL LTLRGDGTGK REAWDRIYDY<br/> 201 DVYNDLGNDP QGKENVRTTL GGSADYPYPR RGRTGRPPTR TDPKSES<b>IP</b><br/> 251 <b>LILSLDIYVP RDER</b>FGHLKM SDFLT<b>YALKS IVQFILPELH ALFDGTPNEF</b><br/> 301 <b>DSFEDVLR</b>LY EGGIR<b>LPQGP LFK</b>AL<b>TDAIP</b> LEMIRELLRT DGEGLRFPT<br/> 351 PLVIKDSKTA WRTDEEFAR<b>E MLAGVNPHI SRL</b>QEFPPKS KLDPEAYGNQ<br/> 401 <b>NSTITAEHIE DKLDGLTVDE AMNNNKL</b>FIL NHHDV<b>LIPYL RR</b>INTTTTKT<br/> 451 YASR<b>TLLFLQ DNGSLKPLAI ELSLPHPDGD QFGVTSKVYT PSDQGV</b>ESSI<br/> 501 <b>WQLAK</b>AYVAV NDSGVHQLIS HWLNTHAVIE PFVIATNRQL SVLHPIHKLL<br/> 551 YPHFRDTMNI NAMARQILIN AGGVLESTVF PSK<b>FAMEMSA VVYKD</b>WV<b>FDP</b><br/> 601 <b>QALPADLVKR</b> GVAVEDSSSP HGVR<b>LLIEDY PYAVD</b>GLEIW SAIKSWVTDY<br/> 651 CSFYYSDEE ILKDNELQAW WKELREVGHG DKKNEPWWPE METPQELIDS<br/> 701 CTTIIWIASA LHA AVNFGQY PYAGYLPNRP TVSRRFMPPEP GTPEYEELKK<br/> 751 NPDKAFLK<b>TI TAQLQTLLGV SLIEILSRHT</b> TDEIYLGQRE SPEWTKDKEP<br/> 801 LAAFDKFGKK LTDIEKQIIQ RINGDNILINR <b>SGPVNAPYTL LFPTSE</b>GGLT<br/> 851 <b>GK</b>GIPNSVSI</p>                       |
| tuber           | Q43190_SOLTU<br>Lipoxygenase<br>Mr 96909<br>pI 5.50         | 303   | <p>1 MLGQIVGGLI GGHHDSKKVK GTVVMKK<b>NA LDFTDLAGSL TDK</b>IFEALGQ<br/> 51 KVSFQLISSV QSDPANGLOQ KHSNPAYLEN FLFTLTPLAA GETAFGVTFD<br/> 101 WNEEFGVPGA FIIKNTHINE FFLKSLTLED VPNHGKVHFV CNSWVYPSFR<br/> 151 YKSDR<b>IFFAN QPYLPSETPE LLR</b>KYRENEL LTLRGDGTGK REAWDRIYDY<br/> 201 DVYNDLGNDP QGKENVRT<b>TTL GGSADYPYPR</b> RGRTGRPPTR TDPKSES<b>IP</b><br/> 251 <b>LILSLDIYVP RDER</b>FGHLK<b>M SDFLT</b><b>YALKS IVQFILPELH ALFDGTPNEF</b><br/> 301 <b>DSFEDVLR</b>LY EGGIR<b>LPQGP LFK</b><b>AL</b><b>TDAIP</b> LEMIRELLRT DGEGLRFPT<br/> 351 PLVIKDSKTA WRTDEEFAR<b>E MLAGVNPHI SRL</b>QEFPPKS KLDPEAYGNQ<br/> 401 NSTITAEHIE DKLDGLTVDE AMNNN<b>KL</b>FIL NHHDV<b>LIPYL RR</b>INTTTTKT<br/> 451 YASR<b>TLLFLQ DNGSLKPLAI ELSLPHPDGD QFGVTSK</b>VYT <b>PSDQGV</b>ESSI<br/> 501 <b>WQLAK</b>AYVAV NDSGVHQLIS HWLNTHAVIE PFVIATNRQL SVLHPIHKLL<br/> 551 YPHFRDTMNI NAMARQILIN AGGVLESTVF PSKFAMEMSA VVYK<b>DWV</b>FDP<br/> 601 <b>QALPADLVKR</b> GVAVEDSSSP HGVR<b>LLIEDY PYAVD</b>GLEIW SAIKSWVTDY<br/> 651 CSFYYSDEE ILKDNELQAW WKELREVGHG DKKNEPWWPE METPQELIDS<br/> 701 CTTIIWIASA LHA AVNFGQY PYAGYLPNRP TVSRRFMPPEP GTPEYEELKK<br/> 751 NPDKAFLK<b>TI TAQLQTLLGV SLIEILSRHT</b> TDEIYLGQRE SPEWTKDKEP<br/> 801 LAAFDKFGKK LTDIEKQIIQ RINGDNILINR <b>SGPVNAPYTL LFPTSE</b>GGLT<br/> 851 <b>GK</b>GIPNSVSI</p> |
